# Supplementary material for: Isopentatungstate-supported metal carbonyl derivative: synthesis, characterization, and catalytic properties for alkene epoxidation
Source: Royal Society of Chemistry journal article supplement (doi:10.1039/c6dt00352d), 2016-01-01
Supplement: c6dt00352d1.pdf [file c6dt00352d1.pdf]

## Supporting Information

### **Isopentatungstate-supported metal carbonyl derivative: synthesis, characterization, and catalytic for alkene epoxidation**

Jie Li, Jipeng Guo, Jiage Jia, Pengtao Ma, Dongdi Zhang□, Jingping Wang and Jingyang Niu□

Henan Key Laboratory of Polyoxometalate Chemistry,  
Institute of Molecular and Crystal Engineering,  
College of Chemistry and Chemical Engineering,  
Henan University, Kaifeng 475004, Henan, China,  
E-mail: ddzhang@henu.edu.cn, jyniu@henu.edu.cn; Fax: (+86)371-23886876.

#### CONTENTS

Section 1. Summary of POM-based metal carbonyl compounds

Section 2. The XRPD patterns

Section 3. Crystallographic data of **1**

Section 4. The IR spectra of **1** and  $\text{Re}(\text{CO})_5\text{Cl}$

Section 5. Thermogravimetric analyses of **1**

Section 6. The UV-vis spectra of **1**

Section 7. Bond valence sum calculations of O

Section 8. Structural figure

Section 9 Catalytic properties

## Section 1. Summary of POM-based metal carbonyl compounds

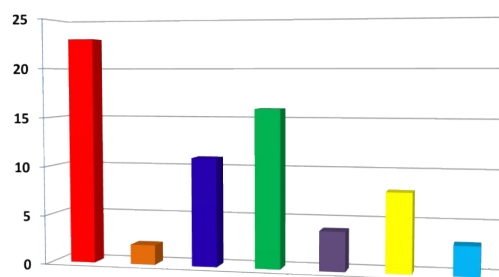

**Figure S1.** Summary of POMs-based metal carbonyl derivatives. Colour code: heteropolyoxotungstates, red; isopolyoxotungstates, orange; heteropolyoxomolybdates, blue; isopolyoxomolybdates, green; isopolyoxoniobates/isopolyoxotantalates, purple; mix-addendum type, yellow; others, light blue.

## Section 2. The XRPD patterns

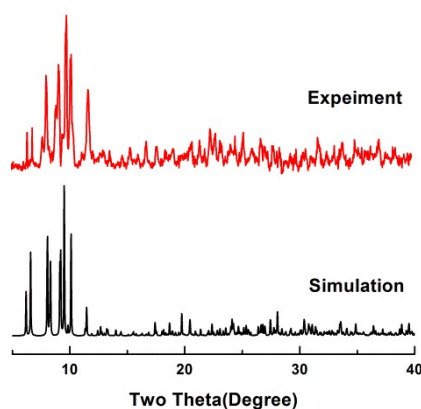

**Figure S2.** The XRPD patterns of **1**

## Section 3. Crystallographic data of **1**

**Table S1.** Crystal data and structure refinement for **1**

| Empirical formula                        | $C_{24}H_{50}N_3O_{38}Re_4W_5K$ |
|------------------------------------------|---------------------------------|
| Formula weight                           | 2691.80                         |
| Temperature                              | 296(2) K                        |
| Wavelength                               | 0.71073 Å                       |
| Crystal system                           | Monoclinic                      |
| space group                              | P2(1)/c                         |
| a/[Å]                                    | 13.8745(8)                      |
| b/[Å]                                    | 19.1737(11)                     |
| c/[Å]                                    | 22.0448(13)                     |
| $\beta$ [°]                              | 105.3700(10)                    |
| Z                                        | 4                               |
| Volume/[Å <sup>3</sup> ]                 | 5654.7(6)                       |
| Calculated density/[g·cm <sup>-3</sup> ] | 3.159                           |
| $\mu$ [mm <sup>-1</sup> ]                | 18.820                          |
| F(000)                                   | 4824                            |

|                                                     |                                          |
|-----------------------------------------------------|------------------------------------------|
| Crystal size                                        | 0.41 x 0.18 x 0.15 mm                    |
| Theta range for data collection                     | 1.86 to 25.00°                           |
| Limiting indices                                    | -16 ≤ h ≤ 16, -22 ≤ k ≤ 16, -26 ≤ l ≤ 26 |
| Reflections collected                               | 28713                                    |
| Independent reflections                             | 9951 [R(int) = 0.0489]                   |
| Completeness to theta = 25.00                       | 99.9 %                                   |
| Data / restraints / parameters                      | 9951 / 6 / 676                           |
| Goodness-of-fit on F <sup>2</sup>                   | 1.031                                    |
| Final R indices [I > 2σ(I)]                         | R1 = 0.0328, wR2 = 0.0715                |
| R indices (all data)                                | R1 = 0.0444, wR2 = 0.0764                |
| Largest diff. peak and hole/[ e · Å <sup>-3</sup> ] | 1.313, -1.799                            |

#### Section 4. The IR spectra of compound 1 and Re(CO)<sub>5</sub>Cl

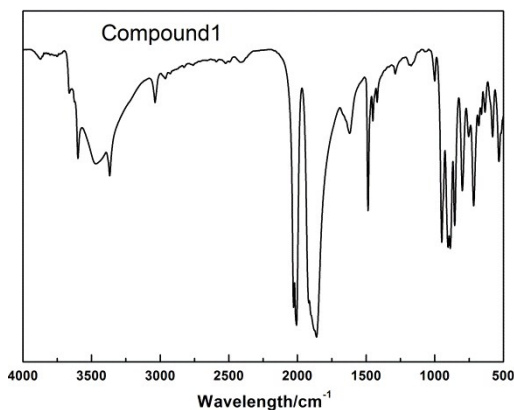

Figure S3. The IR spectrum of compound 1

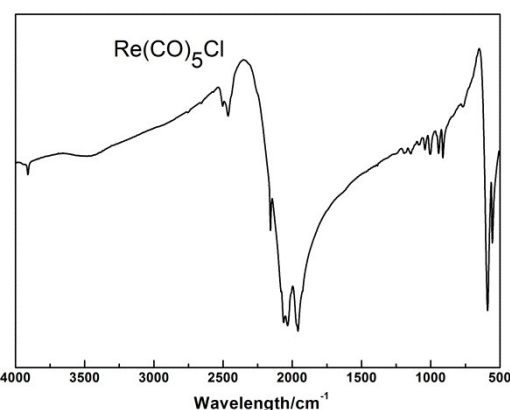

Figure S4. The IR spectrum of Re(CO)<sub>5</sub>Cl

#### Section 5. Thermogravimetric analysis of 1

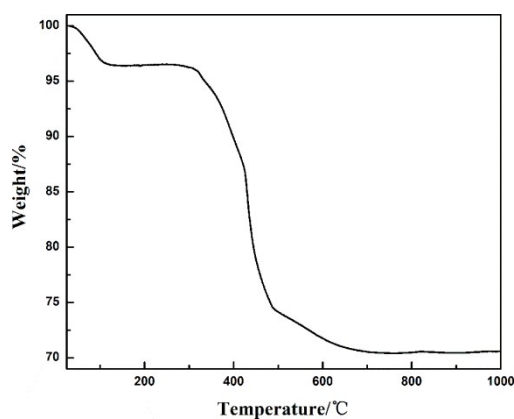

Figure S5. The Thermogravimetric analysis curve of 1

#### Section 6. The UV-vis spectrum of 1

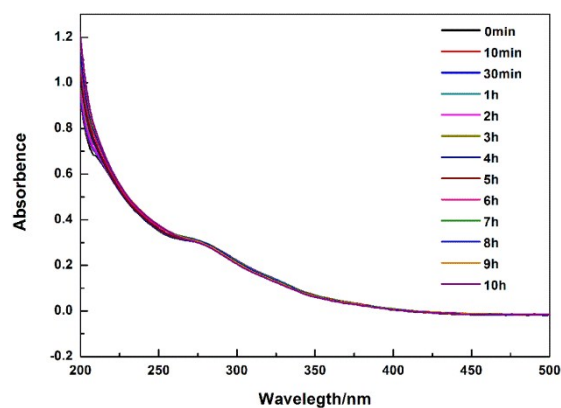

Figure S6. The UV-vis spectrum of **1**

## Section 7. Bond valence sum calculations of O

Table S2 Bond valence sum parameters for O atoms on POM fragments in **1**

| Bond        | Bond length | Bond Valence | Valence Sum                  |
|-------------|-------------|--------------|------------------------------|
| O(1)-C(1)   | 1.157       | 0.233        | $\Sigma(\text{O1}) = 1.877$  |
| O(2)-C(2)   | 1.164       | 0.226        | $\Sigma(\text{O2}) = 1.842$  |
| O(3)-C(3)   | 1.156       | 0.234        | $\Sigma(\text{O3}) = 1.882$  |
| O(4)-C(4)   | 1.154       | 0.236        | $\Sigma(\text{O4}) = 1.892$  |
| O(5)-C(5)   | 1.142       | 0.248        | $\Sigma(\text{O5}) = 1.954$  |
| O(6)-C(6)   | 1.142       | 0.248        | $\Sigma(\text{O6}) = 1.954$  |
| O(7)-C(7)   | 1.143       | 0.247        | $\Sigma(\text{O7}) = 1.949$  |
| O(8)-C(8)   | 1.155       | 0.235        | $\Sigma(\text{O8}) = 1.887$  |
| O(9)-C(9)   | 1.159       | 0.231        | $\Sigma(\text{O9}) = 1.867$  |
| O(10)-C(10) | 1.142       | 0.248        | $\Sigma(\text{O10}) = 1.955$ |
| O(11)-C(11) | 1.163       | 0.227        | $\Sigma(\text{O11}) = 1.847$ |
| O(12)-C(12) | 1.148       | 0.242        | $\Sigma(\text{O12}) = 1.923$ |
| O(13)-Re(4) | 2.14        | -0.17        | $\Sigma(\text{O13}) = 2.097$ |
| O(13)-W(1)  | 1.993       | -0.076       |                              |
| O(13)-W(2)  | 2.076       | -0.159       |                              |
| O(14)-W(4)  | 2.083       | -0.166       | $\Sigma(\text{O14}) = 1.843$ |
| O(14)-W(1)  | 1.848       | 0.069        |                              |
| O(15)-W(1)  | 1.722       | 0.195        | $\Sigma(\text{O15}) = 1.694$ |
| O(16)-W(3)  | 2.079       | -0.162       | $\Sigma(\text{O16}) = 1.931$ |
| O(16)-W(1)  | 1.824       | 0.093        |                              |
| O(17)-Re(4) | 2.179       | -0.209       | $\Sigma(\text{O17}) = 2.056$ |
| O(17)-W(5)  | 2.055       | -0.138       |                              |
| O(17)-W(1)  | 2           | -0.083       |                              |
| O(18)-W(5)  | 2.336       | -0.419       | $\Sigma(\text{O18}) = 1.593$ |
| O(18)-W(4)  | 2.326       | -0.409       |                              |
| O(18)-W(3)  | 2.308       | -0.391       |                              |
| O(18)-W(2)  | 2.37        | -0.453       |                              |

|             |       |        |                              |
|-------------|-------|--------|------------------------------|
| O(18)-W(1)  | 2.365 | -0.448 |                              |
| O(19)-W(2)  | 1.693 | 0.224  | $\Sigma(\text{O19}) = 1.832$ |
| O(20)-Re(3) | 2.133 | -0.163 | $\Sigma(\text{O20}) = 2.080$ |
| O(20)-W(2)  | 1.783 | 0.134  |                              |
| O(21)-W(4)  | 1.938 | -0.021 | $\Sigma(\text{O21}) = 2.053$ |
| O(21)-W(2)  | 1.879 | 0.038  |                              |
| O(22)-W(5)  | 2.029 | -0.112 | $\Sigma(\text{O22}) = 2.082$ |
| O(22)-W(2)  | 2.03  | -0.113 |                              |
| O(22)-Re(4) | 2.155 | -0.185 |                              |
| O(23)-W(3)  | 1.707 | 0.21   | $\Sigma(\text{O23}) = 1.764$ |
| O(24)-W(3)  | 1.948 | -0.031 | $\Sigma(\text{O24}) = 2.055$ |
| O(24)-W(5)  | 1.87  | 0.047  |                              |
| O(25)-W(3)  | 1.919 | -0.002 | $\Sigma(\text{O25}) = 1.957$ |
| O(25)-W(4)  | 1.931 | -0.014 |                              |
| O(26)-W(3)  | 1.777 | 0.14   | $\Sigma(\text{O26}) = 2.144$ |
| O(26)-Re(2) | 2.11  | -0.14  |                              |
| O(27)-W(5)  | 1.727 | 0.19   | $\Sigma(\text{O27}) = 1.671$ |
| O(28)-W(4)  | 1.713 | 0.204  | $\Sigma(\text{O28}) = 1.735$ |
| O(29)-W(4)  | 1.777 | 0.14   | $\Sigma(\text{O29}) = 2.160$ |
| O(29)-Re(1) | 2.102 | -0.132 |                              |
| O(30)-Re(3) | 2.117 | -0.147 | $\Sigma(\text{O30}) = 2.081$ |
| O(30)-W(5)  | 1.79  | 0.127  |                              |
| O(31)-Re(3) | 2.196 | -0.226 | $\Sigma(\text{O31}) = 1.640$ |
| O(31)-Re(2) | 2.201 | -0.231 |                              |
| O(31)-Re(1) | 2.184 | -0.214 |                              |
| O(32)-Re(2) | 2.147 | -0.177 | $\Sigma(\text{O32}) = 1.251$ |
| O(32)-Re(1) | 2.14  | -0.17  |                              |

## Section 8. Structural figure

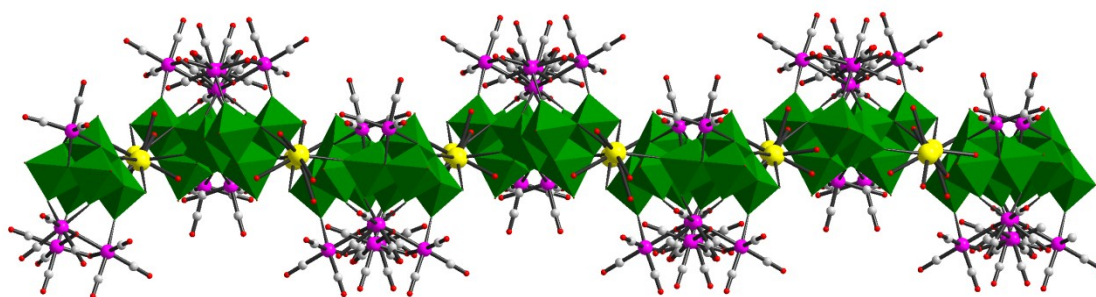

**Figure S7.** View of the **1** along the *c*-axis. Colour code: W, green; K, yellow; Re, purple; C, gray; O, red; WO<sub>6</sub> octahedral, green.

## Section 9 Catalytic properties

### Procedures for Catalytic Oxidation.

A glass tube was charged with the catalyst (9.0 mg), substrate (1.0 mmol), 35% H<sub>2</sub>O<sub>2</sub> (2.0 mmol), and acetonitrile (5.0 mL) as a typical procedure. The reaction system was maintained at a present temperature with vigorous stirring and the catalyst completely dissolves into the reaction medium. The reaction solution was periodically analyzed by gas chromatography.

**Table S3.** The catalytic activity of no catalyst and Re(CO)<sub>5</sub>Cl compared with catalyst **1**<sup>a</sup>

| Entry | Substrate                                                                         | Catalyst.              | Conv. (%) <sup>b</sup> | Sel. (%) |
|-------|-----------------------------------------------------------------------------------|------------------------|------------------------|----------|
| 1     |                                                                                   | —                      | no reaction            | —        |
| 2     |  | Re(CO) <sub>5</sub> Cl | 0.3                    | 99       |
| 3     |                                                                                   | catalyst <b>1</b>      | 98.9                   | 99       |

<sup>a</sup>Reaction conditions: catalyst **1** (3.3 μmol), Re(CO)<sub>5</sub>Cl (13.2 μmol), H<sub>2</sub>O<sub>2</sub> (2mmol), CH<sub>3</sub>CN (5 mL), Temperature (75 °C). <sup>b</sup>Determined by GC analyses based on initial substrate.
